# Supplementary material for: Trends in Medical Imaging During Pregnancy in the United States and Ontario, Canada, 1996 to 2016
Source: PubMed Central journal article supplement (PMC6659354; doi:10.1001/jamanetworkopen.2019.7249), 2019-07-24
Supplement: jamanetwopen-2-e197249-s001.pdf [file jamanetwopen-2-e197249-s001.pdf]

## Supplementary Online Content

Kwan ML, Miglioretti DL, Marlow EC, et al. Trends in medical imaging during pregnancy in the United States and Ontario, Canada, 1996-2016. *JAMA Netw Open*. 2019;2(7):e197249. doi:10.1001/jamanetworkopen.2019.7249

**eTable.** Use Rates of CT, MRI, Radiography, and Fluoroscopy and Angiography per 1000 Pregnancies by 5-Year Intervals of Child's Birth, Among Other Anatomic Category, US Sites and Ontario, Canada

**eFigure.** Use Rates of Radiography in Pregnant Women by Birth Year of Child and Individual Study Site

This supplementary material has been provided by the authors to give readers additional information about their work.

**eTable. Use Rates of CT, MRI, Radiography, and Fluoroscopy and Angiography per 1000 Pregnancies by 5-Year Intervals of Child's Birth, Among Other Anatomic Category, U.S. Sites and Ontario, Canada**

| Modality, Site                     | Extremity     |           |           |           | Neck             |           |           |           | Spine         |           |           |           | Unknown       |           |           |           |
|------------------------------------|---------------|-----------|-----------|-----------|------------------|-----------|-----------|-----------|---------------|-----------|-----------|-----------|---------------|-----------|-----------|-----------|
|                                    | Year of Birth |           |           |           | Year of Birth    |           |           |           | Year of Birth |           |           |           | Year of Birth |           |           |           |
|                                    | 1996-2000     | 2001-2005 | 2006-2010 | 2011-2016 | 1996-2000        | 2001-2005 | 2006-2010 | 2011-2016 | 1996-2000     | 2001-2005 | 2006-2010 | 2011-2016 | 1996-2000     | 2001-2005 | 2006-2010 | 2011-2016 |
| <b>Computed Tomography</b>         |               |           |           |           |                  |           |           |           |               |           |           |           |               |           |           |           |
| U.S. Sites                         | 0.04          | 0.10      | 0.10      | 0.06      | 0.07             | 0.10      | 0.19      | 0.23      | 0.16          | 0.22      | 0.43      | 0.67      | 0.15          | 0.08      | 0.07      | 0.01      |
| Ontario, Canada                    | 0.06          | 0.09      | 0.13      | 0.09      | 0.00             | 0.05      | 0.08      | 0.14      | 0.18          | 0.22      | 0.23      | 0.23      | 0.05          | 0.00      | 0.00      | 0.00      |
| <b>Magnetic Resonance Imaging</b>  |               |           |           |           |                  |           |           |           |               |           |           |           |               |           |           |           |
| U.S. Sites                         | 0.63          | 0.55      | 0.90      | 1.16      | n/a <sup>1</sup> | n/a       | n/a       | n/a       | 0.46          | 1.04      | 1.40      | 1.43      | 0.00          | 0.06      | 0.15      | 0.17      |
| Ontario, Canada                    | 0.08          | 0.16      | 0.28      | 0.42      | n/a              | n/a       | n/a       | n/a       | 0.16          | 0.30      | 0.71      | 1.13      | 0.09          | 0.04      | 0.00      | 0.00      |
| <b>Radiography</b>                 |               |           |           |           |                  |           |           |           |               |           |           |           |               |           |           |           |
| U.S. Sites                         | 23.17         | 23.83     | 21.18     | 21.34     | 23.17            | 23.83     | 21.18     | 21.34     | 0.16          | 0.18      | 0.25      | 0.23      | 4.00          | 4.96      | 4.15      | 3.03      |
| Ontario, Canada                    | 14.83         | 14.95     | 14.07     | 14.48     | 14.83            | 14.95     | 14.07     | 14.48     | 0.20          | 0.52      | 0.15      | 0.20      | 3.56          | 3.25      | 2.67      | 2.38      |
| <b>Angiography and Fluoroscopy</b> |               |           |           |           |                  |           |           |           |               |           |           |           |               |           |           |           |
| U.S. Sites                         | 0.10          | 0.03      | 0.02      | 0.02      | 0.10             | 0.03      | 0.02      | 0.02      | 0.02          | 0.10      | 0.01      | 0.04      | 0.03          | 0.31      | 0.23      | 0.20      |
| Ontario, Canada                    | 0.03          | n/a       | 0.06      | 0.07      | 0.03             | n/a       | 0.06      | 0.07      | 0.08          | 0.05      | 0.04      | 0.00      | 0.14          | 0.15      | 0.49      | 0.62      |

<sup>a</sup> n/a = no observations

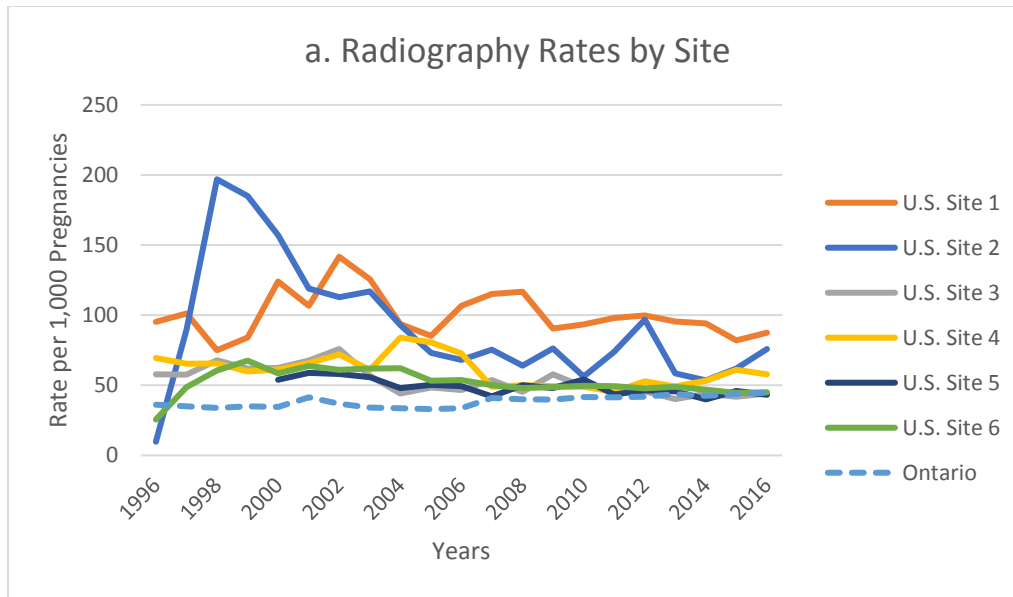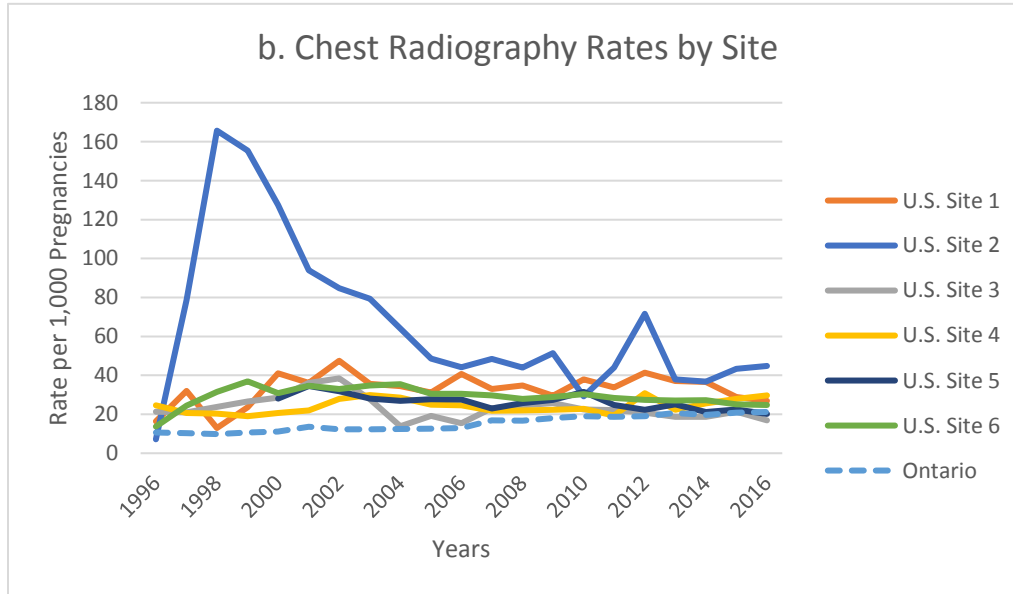

**eFigure . Use Rates of Radiography in Pregnant Women by Birth Year of Child and Individual Study Site**
